# Supplementary material for: The Role of O-Antigen in LPS-Induced Activation of Human NK Cells
Source: Hindawi journal article supplement (doi:10.1155/2019/3062754), 2019-05-20
Supplement: f1 [file 3062754.f1.pdf]

3050 Spruce Street, Saint Louis, MO 63103, USA

Website: www.sigmaaldrich.com

Email USA: techserv@sial.com

Outside USA: eurtechserv@sial.com

## Certificate of Analysis

Product Name:

Lipopolysaccharides from Escherichia coli 055:B5 - purified by ion-exchange chromatography, TLR ligand tested

**Product Number:** L4524  
**Batch Number:** 045M4024V  
**Brand:** SIGMA  
**Storage Temperature:** Store at 2 - 8 °C  
**Quality Release Date:** 16 FEB 2015  
**Recommended Retest Date:** FEB 2021

| Test                      | Specification                 | Result             |
|---------------------------|-------------------------------|--------------------|
| Appearance (Form)         | Lyophilized Powder            | Lyophilized Powder |
| Appearance (Colour)       | White to White w/ Yellow Cast | White              |
| Solubility (Solvent)      | Water                         | Water              |
| Solubility (Conc)         | 4.90 - 5.10 mg/ml             | 5.00 mg/ml         |
| Solubility (Turbidity)    | Hazy                          | Hazy               |
| Solubility (Color)        | Colorless to Light Yellow     | Colorless          |
| Protein Content (Method)  | Lowry-TCA                     | Lowry-TCA          |
| Prot. Content (% Protein) | ≤ 1.00 %                      | 0.93 %             |
| Potency (Sample EU/mg)    | ≥ 500000 EU/mg                | 1200000 EU/mg      |
| UV (% RNA)                | ≤ 1.00 %                      | 0.00 %             |

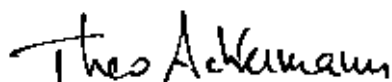

Theo Ackermann PhD MScEng CQM  
Manager, Quality and Regulatory Affairs  
Jerusalem, Israel IL

Sigma-Aldrich warrants, that at the time of the quality release or subsequent retest date this product conformed to the information contained in this publication. The current Specification sheet may be available at Sigma-Aldrich.com. For further inquiries, please contact Technical Service. Purchaser must determine the suitability of the product for its particular use. See reverse side of invoice or packing slip for additional terms and conditions of sale.

3050 Spruce Street, Saint Louis, MO 63103, USA

Website: www.sigmaaldrich.com

Email USA: techserv@sial.com

Outside USA: eurtechserv@sial.com

## Certificate of Analysis

Product Name:

Lipopolysaccharides from Escherichia coli 0111:B4 - purified by ion-exchange chromatography, TLR ligand tested

**Product Number:** L3024  
**Batch Number:** 025M4041V  
**Brand:** SIGMA  
**Storage Temperature:** Store at 2 - 8 °C  
**Quality Release Date:** 14 DEC 2014  
**Recommended Retest Date:** DEC 2020

| Test                      | Specification                 | Result             |
|---------------------------|-------------------------------|--------------------|
| Appearance (Form)         | Lyophilized Powder            | Lyophilized Powder |
| Appearance (Colour)       | White to White w/ Yellow Cast | White              |
| Solubility (Solvent)      | Water                         | Water              |
| Solubility (Conc)         | 4.90 - 5.10 mg/ml             | 5.00 mg/ml         |
| Solubility (Turbidity)    | Hazy                          | Hazy               |
| Solubility (Color)        | Colorless to Light Yellow     | Colorless          |
| Protein Content (Method)  | Lowry-TCA                     | Lowry-TCA          |
| Prot. Content (% Protein) | ≤ 1.00 %                      | 0.64 %             |
| UV (% RNA)                | ≤ 1.00 %                      | 0.00 %             |
| Potency (Sample EU/mg)    | ≥ 500000 EU/mg                | 1200000 EU/mg      |
| Storage Conditions        | Desiccated                    | Desiccated         |

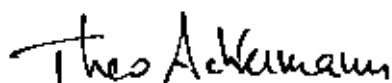

Theo Ackermann PhD MScEng CQM  
Manager, Quality and Regulatory Affairs  
Jerusalem, Israel IL

Sigma-Aldrich warrants, that at the time of the quality release or subsequent retest date this product conformed to the information contained in this publication. The current Specification sheet may be available at Sigma-Aldrich.com. For further inquiries, please contact Technical Service. Purchaser must determine the suitability of the product for its particular use. See reverse side of invoice or packing slip for additional terms and conditions of sale.

3050 Spruce Street, Saint Louis, MO 63103, USA

Website: www.sigmaaldrich.com

Email USA: techserv@sial.com

Outside USA: eurtechserv@sial.com

## Certificate of Analysis

Product Name:

Lipopolysaccharides from Escherichia coli 0127:B8 – purified by ion-exchange chromatography, TLR ligand tested

**Product Number:** L5024  
**Batch Number:** 046M4083V  
**Brand:** SIGMA  
**Storage Temperature:** Store at 2 - 8 °C  
**Quality Release Date:** 27 MAR 2016  
**Recommended Retest Date:** MAR 2022

| Test                      | Specification                 | Result             |
|---------------------------|-------------------------------|--------------------|
| Appearance (Form)         | Lyophilized Powder            | Lyophilized Powder |
| Appearance (Colour)       | White to White w/ Yellow Cast | White              |
| Solubility (Solvent)      | Water                         | Water              |
| Solubility (Conc)         | 4.90 - 5.10 mg/ml             | 5.00 mg/ml         |
| Solubility (Turbidity)    | Faint Hazy to Hazy            | Hazy               |
| Solubility (Color)        | Colorless to Faint Yellow     | Colorless          |
| Protein Content (Method)  | Lowry-TCA                     | Lowry-TCA          |
| Prot. Content (% Protein) | ≤ 1.00 %                      | 0.35 %             |
| UV (% RNA)                | ≤ 1.00 %                      | 0.10 %             |
| Potency (Sample EU/mg)    | ≥ 500000 EU/mg                | > 1200000 EU/mg    |
| Water (by Karl Fischer)   | ≥ 0.00 %                      | 11.21 %            |



Theo Ackermann PhD MScEng CQM  
Manager, Quality and Regulatory Affairs  
Jerusalem, Israel IL

Sigma-Aldrich warrants, that at the time of the quality release or subsequent retest date this product conformed to the information contained in this publication. The current Specification sheet may be available at Sigma-Aldrich.com. For further inquiries, please contact Technical Service. Purchaser must determine the suitability of the product for its particular use. See reverse side of invoice or packing slip for additional terms and conditions of sale.

3050 Spruce Street, Saint Louis, MO 63103, USA

Website: [www.sigmaaldrich.com](http://www.sigmaaldrich.com)Email USA: [techserv@sial.com](mailto:techserv@sial.com)Outside USA: [eurtechserv@sial.com](mailto:eurtechserv@sial.com)

## Certificate of Analysis

Product Name:

Lipopolysaccharides from Escherichia coli 055:B5 - Detoxified

**Product Number:** L9023  
**Batch Number:** 016M4009V  
**Brand:** SIGMA  
**Storage Temperature:** Store at 2 - 8 °C  
**Quality Release Date:** 26 NOV 2015  
**Recommended Retest Date:** NOV 2021

| Test                      | Specification              | Result             |
|---------------------------|----------------------------|--------------------|
| Appearance (Form)         | Lyophilized Powder         | Lyophilized Powder |
| Appearance (Colour)       | White to Yellow/Tan        | White              |
| Solubility (Solvent)      | Water                      | Water              |
| Solubility (Conc)         | 4.90 - 5.10 mg/ml          | 5.00 mg/ml         |
| Solubility (Turbidity)    | Faint Hazy to Hazy         | Faint Hazy         |
| Solubility (Color)        | Colorless to Yellow or Tan | Colorless          |
| Protein Content (Method)  | Lowry-TCA                  | Lowry-TCA          |
| Prot. Content (% Protein) | ≤ 3.00 %                   | 0.68 %             |
| Potency (Sample EU/mg)    | ≤ 1000 EU/mg               | 900 EU/mg          |



Theo Ackermann PhD MScEng CQM  
Manager, Quality and Regulatory Affairs  
Jerusalem, Israel IL

Sigma-Aldrich warrants, that at the time of the quality release or subsequent retest date this product conformed to the information contained in this publication. The current Specification sheet may be available at [Sigma-Aldrich.com](http://Sigma-Aldrich.com). For further inquiries, please contact Technical Service. Purchaser must determine the suitability of the product for its particular use. See reverse side of invoice or packing slip for additional terms and conditions of sale.

3050 Spruce Street, Saint Louis, MO 63103, USA

Website: www.sigmaaldrich.com

Email USA: techserv@sial.com

Outside USA: eurtechserv@sial.com

## Certificate of Analysis

Product Name:

Lipopolysaccharides from Escherichia coli 0111:B4 - Detoxified

**Product Number:** L3023  
**Batch Number:** 055M4086V  
**Brand:** SIGMA  
**Storage Temperature:** Store at 2 - 8 °C  
**Quality Release Date:** 26 MAY 2015  
**Recommended Retest Date:** MAY 2021

| Test                   | Specification                            | Result             |
|------------------------|------------------------------------------|--------------------|
| Appearance (Form)      | Lyophilized Powder                       | Lyophilized Powder |
| Appearance (Colour)    | White to Yellow and Faint Beige to Beige | Light Beige        |
| Solubility (Solvent)   | Water                                    | Water              |
| Solubility (Conc)      | 4.90 - 5.10 mg/ml                        | 5.00 mg/ml         |
| Solubility (Turbidity) | Very Slightly Hazy to Hazy               | Very Slightly Hazy |
| Solubility (Color)     | Faint Yellow to Tan                      | Light Tan          |
| Potency (Sample EU/mg) | ≤ 1000 EU/mg                             | < 1000 EU/mg       |
| Handling Precautions   | Hygroscopic                              | Hygroscopic        |



Theo Ackermann PhD MScEng CQM  
Manager, Quality and Regulatory Affairs  
Jerusalem, Israel IL

Sigma-Aldrich warrants, that at the time of the quality release or subsequent retest date this product conformed to the information contained in this publication. The current Specification sheet may be available at Sigma-Aldrich.com. For further inquiries, please contact Technical Service. Purchaser must determine the suitability of the product for its particular use. See reverse side of invoice or packing slip for additional terms and conditions of sale.

3050 Spruce Street, Saint Louis, MO 63103, USA

Website: www.sigmaaldrich.com

Email USA: techserv@sial.com

Outside USA: eurtechserv@sial.com

## Certificate of Analysis

Product Name:

Lipopolysaccharides (rough strains) from Escherichia coli F583 (Rd mutant)

**Product Number:** L6893  
**Batch Number:** 042M4093V  
**Brand:** SIGMA  
**Storage Temperature:** Store at 2 - 8 °C  
**Quality Release Date:** 26 MAR 2012  
**Recommended Retest Date:** MAR 2015

| Test                      | Specification                 | Result             |
|---------------------------|-------------------------------|--------------------|
| Appearance (Form)         | Lyophilized Powder            | Lyophilized Powder |
| Appearance (Colour)       | White to White w/ Yellow Cast | White              |
| Solubility (Solvent)      | Water                         | Water              |
| Solubility (Conc)         | 4.90 - 5.10 mg/ml             | 5.00 mg/ml         |
| Solubility (Turbidity)    | Slightly Hazy to Turbid       | Hazy               |
| Solubility (Color)        | Colorless to Faint Yellow     | Colorless          |
| Protein Content (Method)  | Lowry-TCA                     | Lowry-TCA          |
| Prot. Content (% Protein) | ≤ 3.00 %                      | 2.80 %             |
| Potency (Sample EU/mg)    | ≥ 500000 EU/mg                | 600000 EU/mg       |



Theo Ackermann PhD MScEng CQM  
 Manager, Quality and Regulatory Affairs  
 Jerusalem, Israel IL

Sigma-Aldrich warrants, that at the time of the quality release or subsequent retest date this product conformed to the information contained in this publication. The current Specification sheet may be available at Sigma-Aldrich.com. For further inquiries, please contact Technical Service. Purchaser must determine the suitability of the product for its particular use. See reverse side of invoice or packing slip for additional terms and conditions of sale.

3050 Spruce Street, Saint Louis, MO 63103, USA

Website: www.sigmaaldrich.com

Email USA: techserv@sial.com

Outside USA: eurtechserv@sial.com

## Certificate of Analysis

Product Name:

Lipopolysaccharides (rough strains) from Escherichia coli EH100 (Ra mutant)

**Product Number:** L9641  
**Lot Number:** 071M4120V  
**Brand:** SIGMA  
**Storage Temperature:** Store at 2-8 DEGREE C  
**Quality Release Date:** 21 JUN 2011  
**Recommended Retest Date:** JUN 2014

| Test                      | Specification             | Result             |
|---------------------------|---------------------------|--------------------|
| Appearance (Form)         | Lyophilized Powder        | Lyophilized Powder |
| Appearance (Colour)       | White to Light Yellow/Tan | Off-White          |
| Solubility (Solvent)      | Water                     | Water              |
| Solubility (Conc)         | 1.90 - 2.10 mg/ml         | 2.00 mg/ml         |
| Solubility (Turbidity)    | Faint Hazy to Hazy        | Slightly Hazy      |
| Solubility (Color)        | Colorless to Faint Yellow | Colorless          |
| Protein Content (Method)  | Lowry-TCA                 | Lowry-TCA          |
| Prot. Content (% Protein) | ≤ 3.00 %                  | 2.42 %             |
| Potency (Sample EU/mg)    | ≥ 500000 EU/mg            | 1200000 EU/mg      |



Theo Ackermann PhD MScEng CQM  
Manager, Quality and Regulatory Affairs  
Jerusalem, Israel IL

Sigma-Aldrich warrants, that at the time of the quality release or subsequent retest date this product conformed to the information contained in this publication. The current Specification sheet may be available at Sigma-Aldrich.com. For further inquiries, please contact Technical Service. Purchaser must determine the suitability of the product for its particular use. See reverse side of invoice or packing slip for additional terms and conditions of sale.

Comment 1  
Comment 2

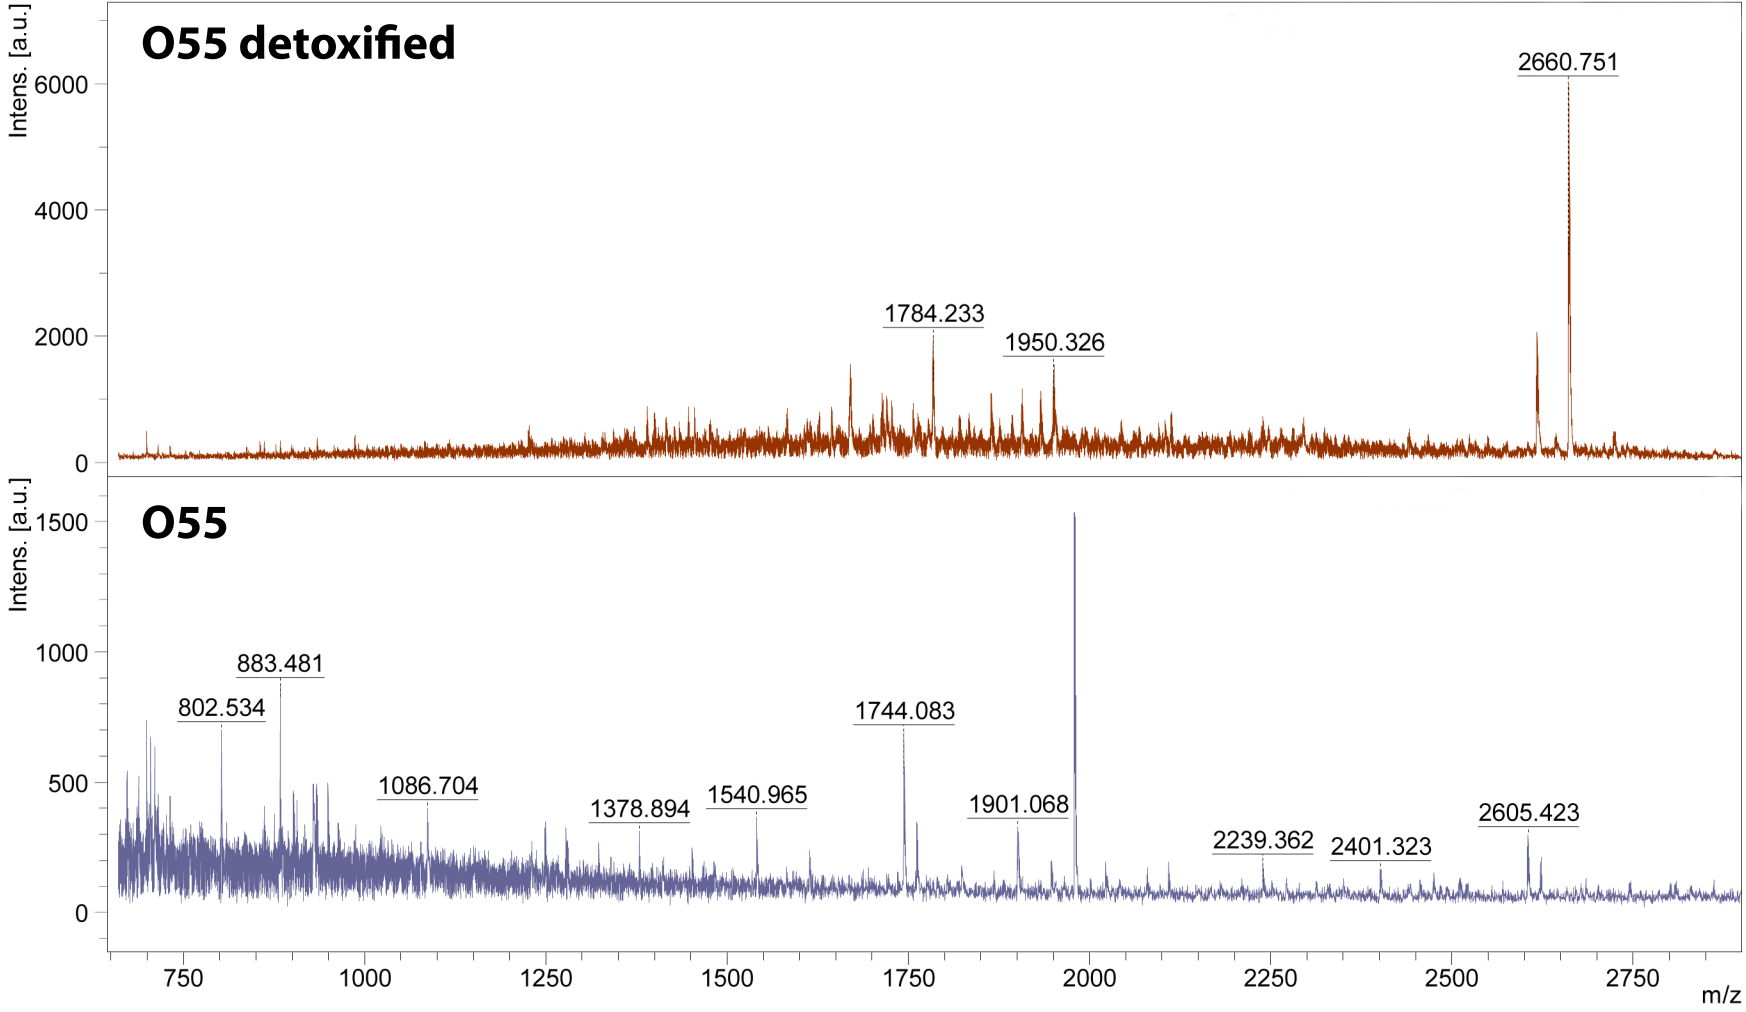

| m/z      | S/N  | Area |
|----------|------|------|
| 802.534  | 3.1  | 208  |
| 883.481  | 3.8  | 297  |
| 1086.704 | 2.1  | 139  |
| 1248.791 | 1.9  | 118  |
| 1378.894 | 2.2  | 109  |
| 1540.965 | 3.0  | 133  |
| 1744.083 | 6.0  | 742  |
| 1901.068 | 3.5  | 180  |
| 1979.252 | 18.0 | 1876 |
| 2239.362 | 1.4  | 73   |
| 2401.323 | 2.3  | 75   |
| 2605.423 | 4.2  | 145  |



Comment 1  
Comment 2

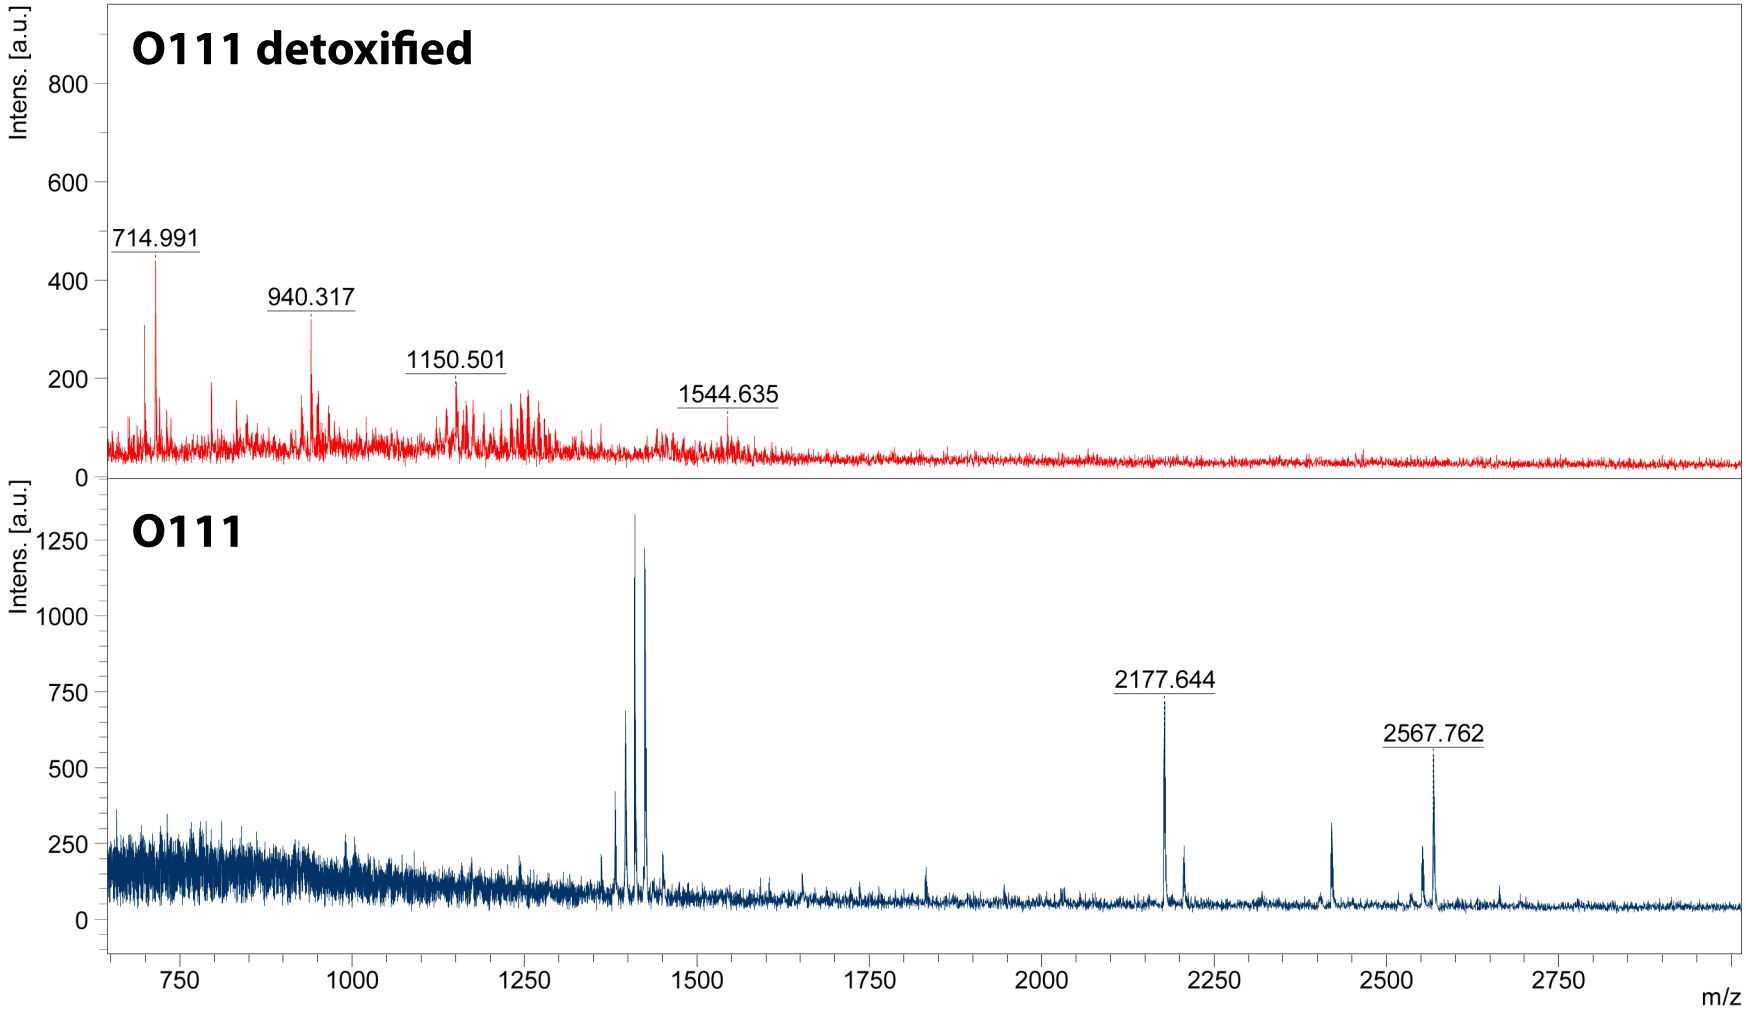

| m/z      | S/N | Area |
|----------|-----|------|
| 699.002  | 5.5 | 61   |
| 714.991  | 7.9 | 81   |
| 940.317  | 5.6 | 73   |
| 1150.501 | 3.4 | 43   |
| 1216.529 | 2.6 | 37   |
| 1254.535 | 3.2 | 49   |
| 1270.518 | 3.0 | 36   |
| 1544.635 | 2.8 | 21   |
